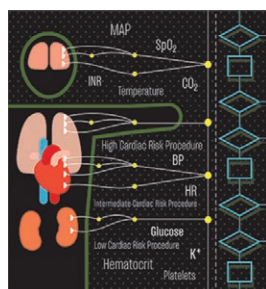

## ON THE COVER:

In this issue of ANESTHESIOLOGY, two original research articles and three editorial views examine the use of data in clinical decision making.

- Kheterpal *et al.*: Impact of a Novel Multiparameter Decision Support System on Intraoperative Processes of Care and Postoperative Outcomes, p. 272
- Liu *et al.*: Defining the Intrinsic Cardiac Risks of Operations to Improve Preoperative Cardiac Risk Assessments, p. 283
- Sessler: Decision Support Alerts: Importance of Validation, p. 241
- Glance *et al.*: Risk Prediction Tools: The Need for Greater Transparency, p. 244
- Javitt: Regulatory Landscape for Clinical Decision Support Technology, p. 247

## ◆ THIS MONTH IN ANESTHESIOLOGY

1A

## ■ SCIENCE, MEDICINE, AND THE ANESTHESIOLOGIST

15A

## ■ INFOGRAPHICS IN ANESTHESIOLOGY

19A

## ◆ EDITORIAL VIEWS

### Decision Support Alerts: Importance of Validation

*D. I. Sessler*

241

### Risk Prediction Tools: The Need for Greater Transparency

*L. G. Glance, A. W. Dick, and T. M. Osler*

244

### Regulatory Landscape for Clinical Decision Support Technology

*G. H. Javitt*

247

### Reporting of Observational Research in ANESTHESIOLOGY: The Importance of Data Quality: Trust but Verify

*A. F. Simpaio and J. A. Gálvez*

250

### Mitigating Microvascular Leak during Fluid Resuscitation of Hemorrhagic Shock

*K. R. Walley*

252

◆ Refers to This Month in Anesthesiology

◆ Refers to Editorial Views

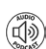

This article has an Audio Podcast

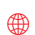

See Supplemental Digital Content

CME Article

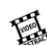

This article has a Video Abstract

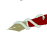

Part of the Letheon writing competition

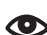

This article has a Visual Abstract

## SPECIAL ARTICLE

### An Anesthesiologist's Perspective on the History of Basic Airway Management: The "Progressive" Era, 1904 to 1960

254

A. A. Matioc

This third installment of the history of basic airway management discusses the transitional—"progressive"—years of anesthesia (1904 to 1960). Basic airway management continued to be central to this period of emerging modern anesthesia and positive pressure ventilation.

## PERIOPERATIVE MEDICINE

### CLINICAL SCIENCE

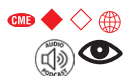

### Impact of a Novel Multiparameter Decision Support System on Intraoperative Processes of Care and Postoperative Outcomes

272

S. Kheterpal, A. Shanks, and K. K. Tremper

Most improvements were time-dependent. Decision support was associated with improved process-of-care measures compared to contemporaneous control patients, but not with improved clinical outcomes. Decision support systems should be formally evaluated because the extent to which they will enhance patient care is not obvious.

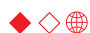

### Defining the Intrinsic Cardiac Risks of Operations to Improve Preoperative Cardiac Risk Assessments

283

J. B. Liu, Y. Liu, M. E. Cohen, C. Y. Ko, and B. J. Sweitzer

An analysis of 3 million surgeries in the American College of Surgeons National Surgical Quality Improvement Program registry demonstrated a broad range of procedure-specific cardiac adverse event risk for 200 commonly performed procedures. These data may advance our patient-specific risk/benefit analyses and medical decision-making.

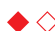

### Incidence of Artifacts and Deviating Values in Research Data Obtained from an Anesthesia Information Management System in Children

293

A. J. Hoorweg, W. Pasma, L. van Wolfswinkel, and J. C. de Graaff

In the particular anesthesia information management system used by the authors, the amount of artifacts was low for heart rate and oxygen saturation and higher for noninvasive and invasive blood pressure and end-tidal carbon dioxide. Values outside the normal range have a higher amount of artifacts than values within the normal range. The amount of artifacts varies with anesthetic technique and phase of anesthesia.

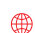

### Propofol-induced Changes in $\alpha$ - $\beta$ Sensorimotor Cortical Connectivity

305

M. Malekmohammadi, N. AuYong, C. M. Price, E. Tsolaki, A. E. Hudson, and N. Pouratian

Although propofol administration led to a local power increase in oscillations in both the sensory and motor cortices, the coupling between these two regions was significantly reduced. The results support the premise that propofol induces a functional disconnection between cortical areas even though local activity in these areas may increase.

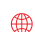

### Period-dependent Associations between Hypotension during and for Four Days after Noncardiac Surgery and a Composite of Myocardial Infarction and Death: A Substudy of the POISE-2 Trial

317

D. I. Sessler, C. S. Meyhoff, N. M. Zimmerman, G. Mao, K. Leslie, S. M. Vásquez, P. Balaji, J. Alvarez-Garcia, A. B. Cavalcanti, J. L. Parlow, P. V. Rahate, M. D. Seeberger, B. Gossetti, S. A. Walker, R. K. Premchand, R. M. Dahl, E. Duceppe, R. Rodseth, F. Botto, and P. J. Devereaux

This study determined the association between hypotension and a composite of 30-day myocardial infarction and death over three periods: (1) intraoperative, (2) remaining day of surgery, and (3) during the initial four postoperative days. Clinically important hypotension was significantly associated with a composite of myocardial infarction and death during each of three perioperative periods, even after adjustment for previous hypotension.

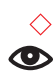

### Cost-effectiveness Analysis of Intraoperative Cell Salvage for Obstetric Hemorrhage

328

G. Lim, V. Melnyk, F. L. Facco, J. H. Waters, and K. J. Smith

The use of cell salvage for cases at high risk for obstetric hemorrhage is economically reasonable; routine cell salvage use for all cesarean deliveries is not.

## CONTENTS

### BASIC SCIENCE

#### **Alphaxalone Binds in Inner Transmembrane $\beta^+-\alpha^-$ Interfaces of $\alpha 1\beta 3\gamma 2$ $\gamma$ -Aminobutyric Acid Type A Receptors**

338

*A. M. Ziemba, A. Szabo, D. W. Pierce, M. Haburcak, A. T. Stern, A. Nourmahnad, E. S. Halpin, and S. A. Forman*

Alphaxalone contacts were identified in the inner transmembrane  $\beta^+-\alpha^-$  intersubunit clefts of  $\gamma$ -aminobutyric acid type A (GABA<sub>A</sub>) receptors. These sites are adjacent to the outer transmembrane sites where etomidate and propofol act. The results suggest that large portions of the transmembrane intersubunit clefts of GABA<sub>A</sub> receptors are allosterically coupled to ion channel gating. These clefts form a number of distinct binding sites for pharmacologic agents that include neurosteroids and currently used intravenous anesthetics.

### ■ CRITICAL CARE MEDICINE

### CLINICAL SCIENCE

#### ◆ **Microvascular Permeability after an Acute and Chronic Salt Load in Healthy Subjects: A Randomized Open-label Crossover Intervention Study**

352

*N. M. G. Rorije, R. H. G. Olde Engberink, Y. Chahid, N. van Vlies, J. P. van Straalen, B. H. van den Born, H. J. Verberne, and L. Vogt*

Twelve healthy males followed both a low-sodium diet and a high-sodium diet for eight days each in a randomized crossover study and received intravenous hypertonic saline infusion over the course of 30 min after the low-sodium diet. Despite similar increases in plasma sodium, chloride, and osmolality, chronic dietary sodium loading did not affect microvascular permeability, but hypertonic saline infusion increased it. Increased microvascular permeability after saline infusion coincided with decreased urinary glycosaminoglycan excretion, indicating damage to the endothelial surface layer.

### BASIC SCIENCE

#### ◆◆ **Vasculotide, an Angiopoietin-1 Mimetic, Restores Microcirculatory Perfusion and Microvascular Leakage and Decreases Fluid Resuscitation Requirements in Hemorrhagic Shock**

361

*M. Trieu, M. van Meurs, A. L. I. van Leeuwen, P. Van Slyke, V. Hoang, L. M. G. Geeraedts, Jr., C. Boer, and C. E. van den Brom*

Hemorrhagic shock in rats activated the angiopoietin/Tie2 system and was associated with vascular leakage and fewer perfused capillaries. These effects were attenuated by pretreatment and posttreatment with a new angiopoietin-1 mimetic, vasculotide.

#### ◆ **A Comparison of Red Cell Rejuvenation *versus* Mechanical Washing for the Prevention of Transfusion-associated Organ Injury in Swine**

375

*M. J. Woźniak, S. Qureshi, N. Sullo, W. Dott, R. Cardigan, M. Wiltshire, M. Nath, N. N. Patel, T. Kumar, A. H. Goodall, and G. J. Murphy*

In a porcine model, red blood cell washing along with an inosine rejuvenation solution restored red cell energy stores, reduced inflammatory responses, and reduced transfusion-associated organ injury in swine in 14-day-old stored blood.

### ■ EDUCATION

### IMAGES IN ANESTHESIOLOGY

#### **Tracheopharyngeal Fistula from Treated Hypopharyngeal Carcinoma**

386

*J. M. Soliz, D.-T. Truong, J. Y. Tsai, and A. T. Truong*

#### **Large Intracranial Aneurysms in a 2-month-old Female: A Rare Occurrence with Serious Anesthetic Challenges**

387

*V. S. Tateosian, J. Smith, and S. Licata*

#### **“Golf Ball” in the Left Ventricular Outflow Tract?**

388

*V. Bora, N. Odo, M. Chura, and M. E. Arthur*

|                                                                                  |            |
|----------------------------------------------------------------------------------|------------|
| <b>Infraclavicular Neurovascular Anatomic Anomaly Seen <i>via</i> Ultrasound</b> | <b>389</b> |
| <i>R. K. Chandrabose and N. S. Sandhu</i>                                        |            |

## CLINICAL FOCUS REVIEW

|                                                                                          |            |
|------------------------------------------------------------------------------------------|------------|
| ◇ <b>Argatroban and Bivalirudin for Perioperative Anticoagulation in Cardiac Surgery</b> | <b>390</b> |
| <i>A. Koster, D. Faraoni, and J. H. Levy</i>                                             |            |

Argatroban and bivalirudin are used as replacement anticoagulants for heparin. The authors review clinical studies for these drugs in the perioperative setting of cardiac surgical patients including extracorporeal management and mechanical support therapy.

## REVIEW ARTICLE

|                                                                                            |            |
|--------------------------------------------------------------------------------------------|------------|
| ◇ <b>Multimodality Neuromonitoring in Adult Traumatic Brain Injury: A Narrative Review</b> | <b>401</b> |
| <i>M. Smith</i>                                                                            |            |

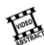

Multimodality monitoring allows individually tailored approaches to the management of traumatic brain injury in which treatment decisions are guided by monitored changes in physiologic variables.

## MIND TO MIND

|                                                                                                        |            |
|--------------------------------------------------------------------------------------------------------|------------|
|  <b>Recovery Room</b> | <b>416</b> |
| <i>B. Greenspan</i>                                                                                    |            |
| <b>One More Step</b>                                                                                   | <b>417</b> |
| <i>R. Blomberg</i>                                                                                     |            |

## ■ CORRESPONDENCE

|                                                                                                                                     |            |
|-------------------------------------------------------------------------------------------------------------------------------------|------------|
| <b>Avoidance of Hyperoxemia during Cardiopulmonary Bypass: Why Does Pathophysiology Not Always Translate into Clinical Outcome?</b> | <b>419</b> |
| <i>H. P. Grocott and D. Faraoni</i>                                                                                                 |            |

|                                                   |            |
|---------------------------------------------------|------------|
| <b>Clinical Technology and Glucose Management</b> | <b>420</b> |
| <i>D. Cattano</i>                                 |            |

|                        |  |
|------------------------|--|
| <b>In Reply</b>        |  |
| <i>J. M. Ehrenfeld</i> |  |

|                                                                                                                       |            |
|-----------------------------------------------------------------------------------------------------------------------|------------|
| <b>Perioperative Pain Management for Total Knee Arthroplasty: Need More Focus on the Forest and Less on the Trees</b> | <b>420</b> |
| <i>C. A. J. Webb, S. Madison, S. B. Goodman, E. R. Mariano, and J.-L. Horn</i>                                        |            |

|                                                               |  |
|---------------------------------------------------------------|--|
| <b>In Reply</b>                                               |  |
| <i>A. Sulieman Terkawi, E. C. Nemergut, and D. I. Sessler</i> |  |

|                                            |            |
|--------------------------------------------|------------|
| <b>Solvent Matters!</b>                    | <b>422</b> |
| <i>T.-N. Chamaraux-Tran and H. Beloeil</i> |            |

|                                                                                                         |  |
|---------------------------------------------------------------------------------------------------------|--|
| <b>In Reply</b>                                                                                         |  |
| <i>W. Xing, D.-T. Chen, J.-H. Pan, Y.-H. Chen, Y. Yan, Q. Li, R.-F. Xue, Y.-F. Yuan, and W.-A. Zeng</i> |  |

|                                                        |            |
|--------------------------------------------------------|------------|
| <b>Distal Subclavian Cannulation and Extravasation</b> | <b>423</b> |
| <i>B. T. Gierl</i>                                     |            |

|                                                                           |            |
|---------------------------------------------------------------------------|------------|
| <b>Taller People Should Have as Their Normal a Higher Body Mass Index</b> | <b>424</b> |
| <i>J. V. Roth</i>                                                         |            |

## CONTENTS

### Unusual Catheter Placement on Chest Radiograph: Two Dimensions, Two Possible Locations (or More)

A. K. Swenson Schalkwyk and G. B. Hammer

424

### In Reply

R. Deshpande and V. Kurup

## REVIEWS OF EDUCATIONAL MATERIAL

426

## ANNOUNCEMENTS

427

## CAREERS & EVENTS

21A

## INSTRUCTIONS FOR AUTHORS

The most recently updated version of the Instructions for Authors is available at [www.anesthesiology.org](http://www.anesthesiology.org). Please refer to the Instructions for the preparation of any material for submission to ANESTHESIOLOGY.

Manuscripts submitted for consideration for publication must be submitted in electronic format. The preferred method is via the Journal's Web site (<http://www.anesthesiology.org>). Detailed directions for submissions and the most recent version of the Instructions for Authors can be found on the Web site (<http://www.anesthesiology.org>). Books and educational materials should be sent to Alan Jay Schwartz, M.D., M.S.Ed., Director of Education, Department of Anesthesiology and Critical Care Medicine, The Children's Hospital of Philadelphia, 34th Street and Civic Center Blvd., Room 9327, Philadelphia, Pennsylvania 19104-4399. Requests for permission to duplicate materials published in ANESTHESIOLOGY should be submitted in electronic format, to the Permissions Department ([journalpermissions@lww.com](mailto:journalpermissions@lww.com)). Advertising and related correspondence should be addressed to Advertising Manager, ANESTHESIOLOGY, Wolters Kluwer Health, Inc., Two Commerce Square, 2001 Market Street, Philadelphia, Pennsylvania 19103 (Web site: <http://www.wkacenter.com/>). Publication of an advertisement in ANESTHESIOLOGY does not constitute endorsement by the Society or Wolters Kluwer Health, Inc. of the product or service described therein or of any representations made by the advertiser with respect to the product or service.

**ANESTHESIOLOGY** (ISSN 0003-3022) is published monthly by Wolters Kluwer Health, Inc., 14700 Citicorp Drive, Bldg 3, Hagerstown, MD 21742. Business office: Two Commerce Square, 2001 Market Street, Philadelphia, PA 19103. Periodicals postage paid at Hagerstown, MD, and at additional mailing offices. Copyright © 2018, the American Society of Anesthesiologists, Inc.

**Annual Subscription Rates:** *United States*—\$930 Individual, \$2054 Institution, \$374 In-training. *Rest of World*—\$981 Individual, \$2281 Institution, \$374 In-training. Single copy rate \$207. Subscriptions outside of North America must add \$55 for airfreight delivery. Add state sales tax, where applicable. The GST tax of 7% must be added to all orders shipped to Canada (Wolters Kluwer Health, Inc.'s GST Identification #895524239, Publications Mail Agreement #1119672). Indicate in-training status and name of institution. Institution rates apply to libraries, hospitals, corporations, and partnerships of three or more individuals. Subscription prices outside the United States must be prepaid. Prices subject to change without notice. Subscriptions will begin with currently available issue unless otherwise requested. Visit us online at [www.lww.com](http://www.lww.com).

Individual and in-training subscription rates include print and access to the online version. Online-only subscriptions for individuals (\$308) and persons in training (\$308) are available to nonmembers and may be ordered by downloading a copy of the Online Subscription FAXback Form from the Web site, completing the information requested, and faxing the completed form to 301-223-2400. Institutional rates are for print only; online subscriptions are available via Ovid. Institutions can choose to purchase a print and online subscription together for a discounted rate. Institutions that wish to purchase a print subscription, please contact Wolters Kluwer Health, Inc., 14700 Citicorp Drive, Bldg 3, Hagerstown, MD 21742; phone: 800-638-3030; fax: 301-223-2400. Institutions that wish to purchase an online

subscription or online with print, please contact the Ovid Regional Sales Office near you or visit [www.ovid.com/site/index.jsp](http://www.ovid.com/site/index.jsp) and select Contact and Locations.

**Address for non-member subscription information, orders, or change of address** (except Japan): Wolters Kluwer Health, Inc., 14700 Citicorp Drive, Bldg 3, Hagerstown, MD 21742; phone: 800-638-3030; fax: 301-223-2400. In Japan, contact Wolters Kluwer Health Japan Co., Ltd., Forecast Mita Building 5th floor, 1-3-31 Mita Minato-ku, Tokyo, Japan 108-0073; phone: +81 3 5427 1969; email: [journal@wkjapan.co.jp](mailto:journal@wkjapan.co.jp).

**Address for member subscription information, orders, or change of address:** Members of the American Society of Anesthesiologists receive the print and online journal with their membership. To become a member or provide a change of address, please contact the American Society of Anesthesiologists, 1061 American Lane, Schaumburg, Illinois 60173-4973; phone: 847-825-5586; fax: 847-825-1692; email: [membership@ASAhq.org](mailto:membership@ASAhq.org). For all other membership inquiries, contact Wolters Kluwer Health, Inc., Customer Service Department, P.O. Box 1610, Hagerstown, MD 21740; phone: 800-638-3030; fax: 301-223-2400.

**Postmaster:** Send address changes to ANESTHESIOLOGY, P.O. BOX 1610, Hagerstown, MD 21740.

**Advertising:** Please contact Hilary Druker, Advertising Field Sales Representative, Health Learning, Research & Practice, Medical Journals, Wolters Kluwer Health, Inc.; phone: 609-304-9187; e-mail: [Hilary.Druker@wolterskluwer.com](mailto:Hilary.Druker@wolterskluwer.com). For classified advertising: Joe Anzuena, Recruitment Advertising Representative, Wolters Kluwer Health, Inc., Two Commerce Square, 2001 Market Street, Philadelphia, PA 19103; phone: 215-521-8532; fax: 215-701-2410; e-mail: [Joe.Anuena@wolterskluwer.com](mailto:Joe.Anuena@wolterskluwer.com).
